# Supplementary material for: Stress and strain relations of RC circular, square and rectangular columns externally wrapped with fiber ropes
Source: Sci Rep. 2024 Feb 20;14:4181. doi: 10.1038/s41598-024-54586-9 (PMC10879512; doi:10.1038/s41598-024-54586-9)
Supplement: Supplementary file 1 — Supplementary Information. [file 41598_2024_54586_MOESM1_ESM.docx]

**Appendix**

Richart et al. 66 proposed the following form to relate the compressive strength of confined concrete and the peak strain to the lateral confining pressure .

|  | (A1) |
| --- | --- |
|  | (A2) |

where and are coefficients estimated by the regression on experimental data, is the compressive strength in an unstrengthened condition, and is the compressive strain corresponding to . According to Pellegrino and Modena 50, the total confining pressure is computed as the sum of and reduced by the ratio , where is the area of concrete core measured from outside the transverse reinforcement and is the gross area of the section.

|  | (A3) |
| --- | --- |

It is established that the efficiency of exterior wraps is better on circular sections as compared to rectilinear sections 48,50,60,67. This is because the cross-section of a circular section is fully confined. On the contrary, the presence of sharp corners induces stress concentrations that result in the reduced efficiency of external wraps 35. The lateral confining pressure by the FRRP sheet is related to the external confinement by Eq. (A4).

|  | (A4) |
| --- | --- |

where is the rupture capacity of FRRP, is the thickness of FRRP, is the number of FRRP layers applied, is the size of the section, and is a factor that accounts for the reduced efficiency of FRRP wraps due to corners. For a circular section, is its diameter, whereas the is replaced by an equivalent value defined by Eq. (A5) and shown in Figure A1 35.

|  | (A5) |
| --- | --- |

where is the width and is the depth of the section.





**Figure A1**. Description of bursting pressure and forces in FRRP sheet

The coefficient is defined as the product of and , where is a factor that considers the reduced efficiency of FRRP wraps along the height of the specimen. For continuous FRRP wraps as used in this study, the term is taken as 1.0. The factor considers the reduced efficiency of FRRP wraps within a section. For a circular section, the factor is taken as 1.0, whereas is calculated using Eq. (A6) 60,65.

|  | (A6) |
| --- | --- |

where and are defined in Figure 16a and is the volumetric ratio of the longitudinal reinforcement. The definition of the confinement pressure due to internal transverse reinforcement is adopted from Mander et al. 65, defined in Eq. (A7) and illustrated in Figure A2.

|  | (A7) |
| --- | --- |

where and are the volumetric ratio and yield strength of transverse reinforcement, respectively. The coefficient defines the reduction in the efficiency of transverse reinforcement due to sharp corners in rectilinear sections and the discontinuity of transverse reinforcement along the height of the specimen and defined as:

|  | (A8) |
| --- | --- |

where is a factor that considers the ineffectively confined areas within a section. For circular sections, is taken as 1.0, whereas is defined in Eq. (A9) and shown in Figure 16b for rectilinear sections 50,60,65. Similarly, the parameter incorporates the ineffectively confined areas along the height of the specimen, as defined in Eq. (A10).

|  | (A9) |
| --- | --- |
|  | (A10) |

where is the longitudinal reinforcement volumetric ratio, is the clear distance between consecutive hoops, and and are defined in Figure A2b.


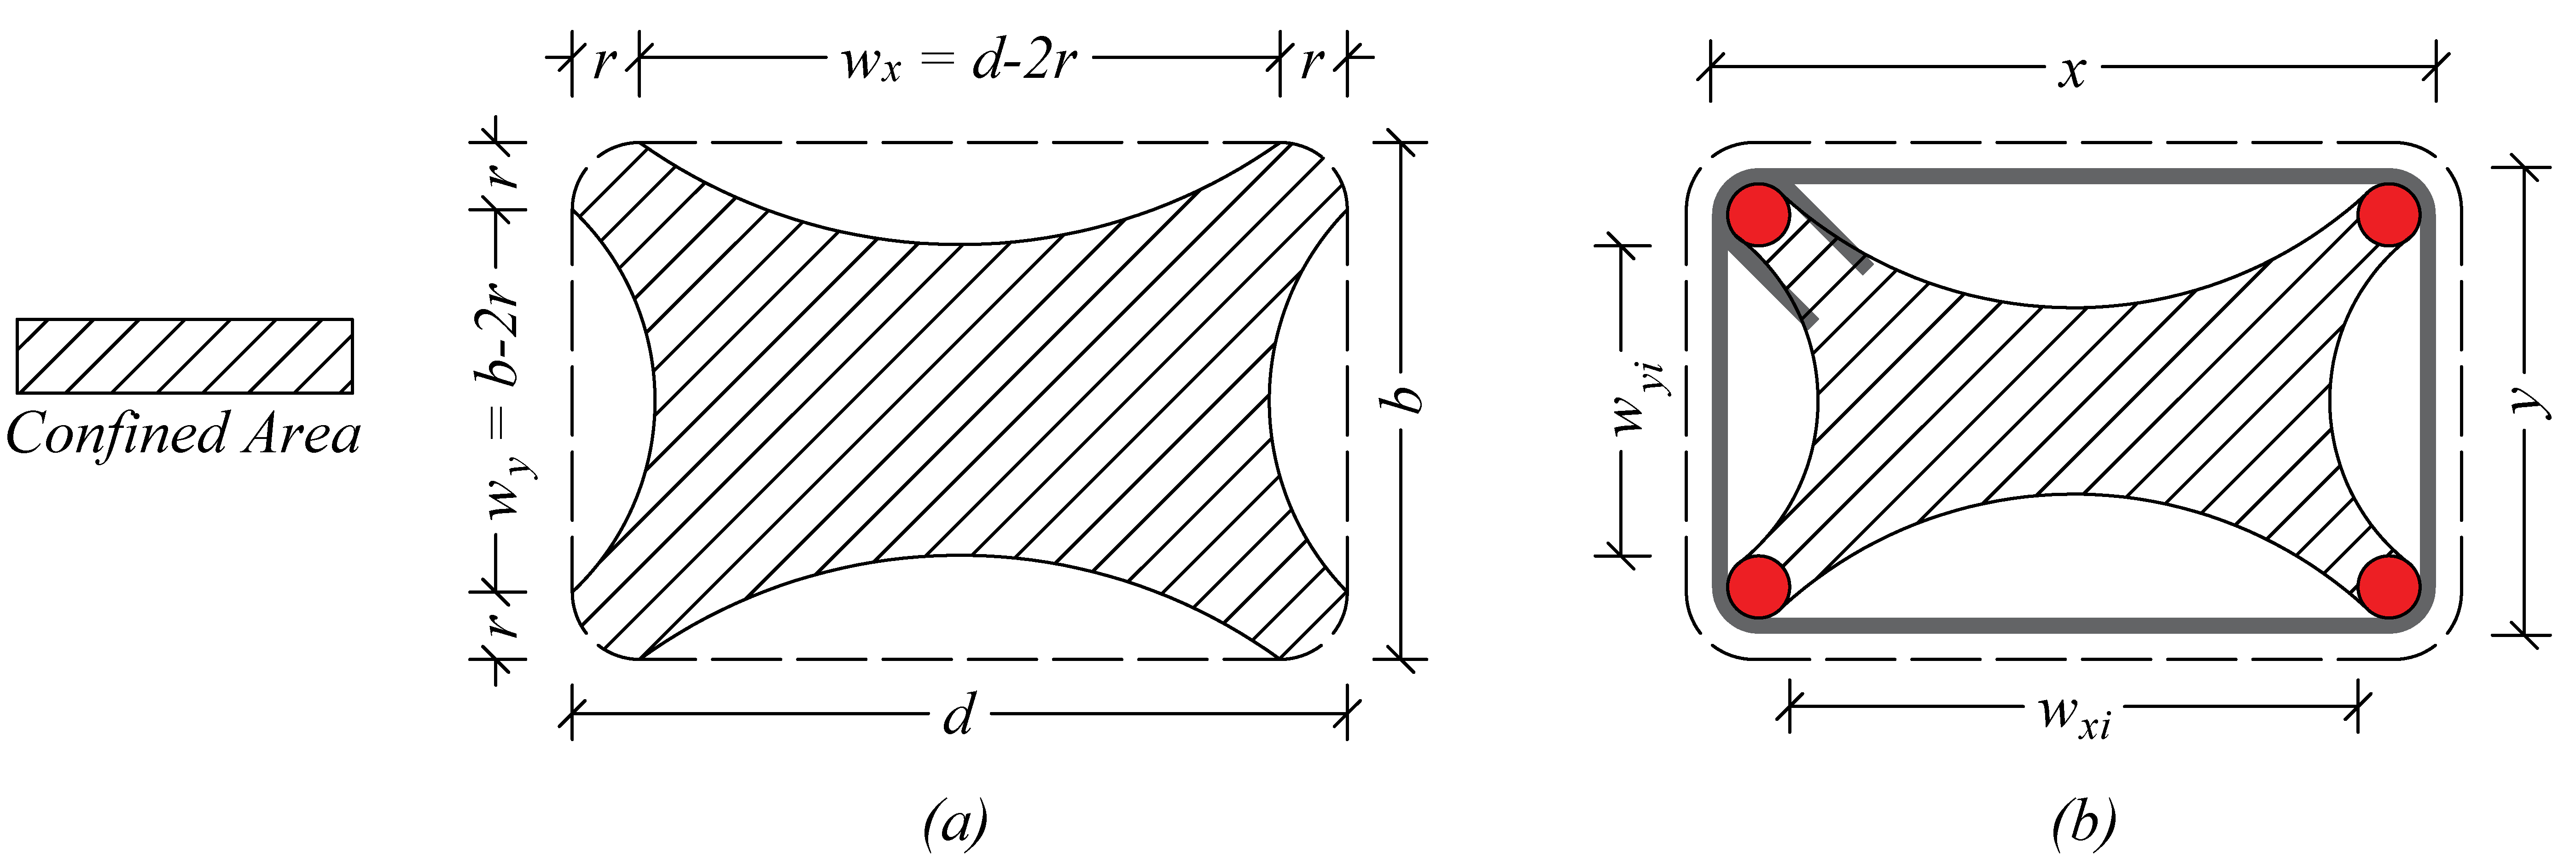


**Figure A2**. Definition of confined areas along a rectangular section (a) by FRP and (b) by internal steel reinforcement.
